# Supplementary material for: Barriers and Facilitators to Upper Gastrointestinal Endoscopy among Patients with Dyspepsia at Two National Referral Hospitals in Uganda: A Prospective Cohort Study
Source: Research Square preprint supplement (doi:10.21203/rs.3.rs-7574962/v1), 2025-09-30
Supplement: Supplementary file 1 [file 331ce9d1c2054b4b605a6b02.docx]

### ***Figure 2: Conceptual Framework***

Community level Factors

Organizational (Health System) Factors

Interpersonal Factors (Family, Friends, etc.)

Intrapersonal Factors (Individual)

**THEORETICAL FOUNDATION**

**Sociodemographic Factors:**

Gender, Age, Education, Marital status, Income, smoking, alcohol consumption, medical insurance

**Intrapersonal Factors:**

Lack of awareness of benefits of Endoscopy, fear of endoscopy procedure, fear of endoscopy outcome, high cost of endoscopy, time constraints

**Interpersonal Factors:**

Family-social history of GI cancer

**STUDY’S CONCEPT**

**Attendance of EGD**

**Diagnosis of Cause of Dyspepsia**

Public Policy Factors
