# Supplementary material for: Barriers and Facilitators to Upper Gastrointestinal Endoscopy among Patients with Dyspepsia at Two National Referral Hospitals in Uganda: A Prospective Cohort Study
Source: Research Square preprint supplement (doi:10.21203/rs.3.rs-7574962/v1), 2025-09-30
Supplement: Supplementary file 2 [file 85d1124c809d473265a99a58.docx]

## ***Figure 3: Patient Flow Chart***

Patients attending GI clinics from December 2024 through February 2025 (434 at KNRH & 1,396 at MNRH)

After 1-month interval, participants were followed up with telephone interviews to capture data form their treatment seeking history.

423 participants were subjected to interviewer-administered questionnaire at the initial visit to GI clinic, in physical interviews to capture sociodemographic data.

21 participants were lost to follow up as;

- 6 died before 1 month elapsed & before doing EGD
- 15 telephone switched off / disconnected

402 participants responded as;

- 18 attended EGD
- 384 did not attend EGD

1,407 patients were excluded from the study because of;

- Referral indication to do EGD
- Altered mental status
- Age < 30 years
- Lack of symptoms of Dyspepsia
- Refusal to Consent

157 patients at KNRH & 266 patients at MNRH were recruited into the study because of;

- Age ≥ 30 years
- Complaints of dyspepsia
- Recommended by doctor to do EGD at their current visit to GI clinic
